# Supplementary material for: No increase in readmissions or adverse events after implementation of fast-track program in total hip and knee replacement at 8 Swedish hospitals: An observational before-and-after study of 14,148 total joint replacements 2011–2015
Source: PubMed Central journal article supplement (PMC6202734; doi:10.1080/17453674.2018.1492507), 2018-07-09
Supplement: IORT_A_1492507_SM9947.pdf [file IORT_A_1492507_SM9947.pdf]

## Supplementary data

### Appendix 1: ICD 10- and NOMESCO codes used for definition of adverse events according to the Swedish Knee Arthroplasty Register (SKAR)

#### DA. Surgical diagnosis

If the codes occur as the main or a secondary diagnosis during the first admission or as the main diagnosis during a later admission

| Exact code |                                                                                                                              |
|------------|------------------------------------------------------------------------------------------------------------------------------|
| G978       | Other postprocedural disorders of nervous system                                                                             |
| G979       | Postprocedural disorder of nervous system, unspecified                                                                       |
| M966G      | Fracture of bone following insertion of orthopaedic implant, joint prosthesis, or bone plate knee/lower leg                  |
| M968       | Other postprocedural musculoskeletal disorders                                                                               |
| M969       | Postprocedural musculoskeletal disorder, unspecified                                                                         |
| T810       | Haemorrhage and haematoma complicating a procedure, not elsewhere classified                                                 |
| T812       | Accidental puncture and laceration during a procedure, not elsewhere classified                                              |
| T813       | Disruption of operation wound, not elsewhere classified                                                                      |
| T814       | Infection following a procedure, not elsewhere classified                                                                    |
| T815       | Foreign body accidentally left in body cavity or operation wound following a procedure                                       |
| T816       | Acute reaction to foreign substance accidentally left during a procedure                                                     |
| T817       | Vascular complications following a procedure, not elsewhere classified                                                       |
| T818       | Other complications of procedures, not elsewhere classified                                                                  |
| T818W      | Other complications of procedures, not elsewhere classified                                                                  |
| T819       | Unspecified complication of procedure                                                                                        |
| T840       | Mechanical complication of internal joint prosthesis                                                                         |
| T840G      | Mechanical complication of internal joint prosthesis knee/lower leg                                                          |
| T843       | Mechanical complication of other bone devices, implants and grafts                                                           |
| T843G      | Mechanical complication of other bone devices, implants and grafts knee/lower leg                                            |
| T844       | Mechanical complication of other internal orthopaedic devices, implants and grafts                                           |
| T844G      | Mechanical complication of other internal orthopaedic devices, implants and grafts, knee/lower leg                           |
| T845       | Infection and inflammatory reaction due to internal joint prosthesis                                                         |
| T845G      | Infection and inflammatory reaction due to internal joint prosthesis knee/lower leg                                          |
| T847       | Infection and inflammatory reaction due to other internal orthopaedic prosthetic devices, implants and grafts                |
| T847G      | Infection and inflammatory reaction due to other internal orthopaedic prosthetic devices, implants and grafts knee/lower leg |
| T848       | Other complications of internal orthopaedic prosthetic devices, implants and grafts                                          |
| T848G      | Other complications of internal orthopaedic prosthetic devices, implants and grafts knee/lower leg                           |
| T849       | Unspecified complication of internal orthopaedic prosthetic device, implant and graft                                        |
| T888       | Other specified complications of surgical and medical care, not elsewhere classified                                         |
| T889       | Complication of surgical and medical care, unspecified                                                                       |

#### DB. Diagnosis for knee-related events

If the codes occur as the main or a secondary diagnosis during the first admission or as a main diagnosis during a later admission

| Exact code |                                                                           |
|------------|---------------------------------------------------------------------------|
| G573       | Lesion of lateral popliteal nerve                                         |
| G574       | Lesion of medial popliteal nerve                                          |
| M000       | Staphylococcal arthritis and polyarthritis                                |
| M000G      | Staphylococcal arthritis and polyarthritis, knee                          |
| M002G      | Other streptococcal arthritis and polyarthritis, knee                     |
| M008G      | Arthritis and polyarthritis due to other specified bacterial agents, knee |
| M009G      | Pyogenic arthritis, unspecified, knee                                     |
| M220       | Recurrent dislocation of patella                                          |
| M221       | Recurrent subluxation of patella                                          |
| M236       | Other spontaneous disruption of ligament(s) of knee                       |
| M244G      | Recurrent dislocation and subluxation of joint, knee                      |
| M621G      | Other rupture of muscle (nontraumatic), knee/lower leg                    |
| M662G      | Spontaneous rupture of extensor tendons, knee/lower leg                   |
| M663G      | Spontaneous rupture of flexor tendons, knee/lower leg                     |
| M843G      | Stress fracture, lower leg                                                |
| S342       | Injury of nerve root of lumbar and sacral spine                           |
| S800       | Contusion of knee                                                         |
| S810       | Open wound of knee                                                        |
| S830       | Dislocation of patella                                                    |
| S831       | Dislocation of knee                                                       |
| S834L      | Sprain and strain involving lateral collateral ligament of knee           |
| S834M      | Sprain and strain involving medial collateral ligament of knee            |
| S835R      | Sprain and strain involving anterior cruciate ligament of knee            |
| S835S      | Sprain and strain involving anterior cruciate ligament of knee            |
| S835X      | Sprain and strain involving cruciate ligament of knee, unspecified        |
| S840       | Injury of tibial nerve at lower leg level                                 |
| S841       | Injury of peroneal nerve at lower leg level                               |

#### If the codes occur as the main diagnosis after the first admission

| Exact code |                                                    |
|------------|----------------------------------------------------|
| M235       | Chronic instability of knee                        |
| M240G      | Loose body in joint, knee                          |
| M245G      | Contracture of joint, knee                         |
| M246G      | Ankylosis of joint, knee                           |
| M256       | Stiffness of joint, not elsewhere classified       |
| M256G      | Stiffness of joint, not elsewhere classified, knee |
| M659G      | Synovitis and tenosynovitis, unspecified, knee     |
| M860G      | Acute haematogenous osteomyelitis, knee/lower leg  |
| M861G      | Other acute osteomyelitis, knee/lower leg          |
| M866       | Other chronic osteomyelitis                        |
| M866G      | Other chronic osteomyelitis, knee/lower leg        |
| M895G      | Osteolysis, knee/lower leg                         |

**DC. Cardiovascular diagnosis**

If the codes occur as the main or a secondary diagnosis during the first admission or as the main diagnosis during a later admission

| Exact code |                                                                                |
|------------|--------------------------------------------------------------------------------|
| I260       | Pulmonary embolism with mention of acute cor pulmonale                         |
| I269       | Pulmonary embolism without mention of acute cor pulmonale                      |
| I460       | Cardiac arrest with successful resuscitation                                   |
| I461       | Sudden cardiac death, so described                                             |
| I469       | Cardiac arrest, unspecified                                                    |
| I490       | Ventricular fibrillation and flutter                                           |
| I649       | Stroke, not specified as haemorrhage or infarction                             |
| I770       | Arteriovenous fistula, acquired                                                |
| I771       | Stricture of artery                                                            |
| I772       | Rupture of artery                                                              |
| I819       | Portal vein thrombosis                                                         |
| I978       | Other postprocedural disorders of circulatory system, not elsewhere classified |
| I979       | Postprocedural disorder of circulatory system, unspecified                     |
| J809       | Adult respiratory distress syndrome                                            |
| J819       | Pulmonary oedema                                                               |
| T811       | Shock during or resulting from a procedure, not elsewhere classified           |

**Code starts with**

|     |                                                                                      |
|-----|--------------------------------------------------------------------------------------|
| I21 | Acute myocardial infarction                                                          |
| I24 | Other acute ischaemic heart diseases                                                 |
| I60 | Subarachnoid haemorrhage                                                             |
| I61 | Intracerebral haemorrhage                                                            |
| I62 | Other nontraumatic intracranial haemorrhage                                          |
| I63 | Cerebral infarction                                                                  |
| I65 | Occlusion and stenosis of precerebral arteries, not resulting in cerebral infarction |
| I66 | Occlusion and stenosis of cerebral arteries, not resulting in cerebral infarction    |
| I72 | Other aneurysm and dissection                                                        |
| I74 | Arterial embolism and thrombosis                                                     |
| I82 | Other venous embolism and thrombosis                                                 |

**DM. Diagnoses for other medical events**

If the codes occur as the main or a secondary diagnosis during the first admission or as a secondary diagnosis during a later admission

| Exact code |                                                              |
|------------|--------------------------------------------------------------|
| J952       | Acute pulmonary insufficiency following nonthoracic surgery  |
| J953       | Chronic pulmonary insufficiency following surgery            |
| J955       | Postprocedural subglottic stenosis                           |
| J958       | Other postprocedural respiratory disorders                   |
| J959       | Postprocedural respiratory disorder, unspecified             |
| J981       | Pulmonary collapse                                           |
| N990       | Postprocedural renal failure                                 |
| N998       | Other postprocedural disorders of genitourinary system       |
| N999       | Postprocedural disorder of genitourinary system, unspecified |
| R339       | Retention of urine                                           |

**Code starts with**

|     |                                                                       |
|-----|-----------------------------------------------------------------------|
| L89 | Decubitus ulcer and pressure area                                     |
| I80 | Phlebitis and thrombophlebitis                                        |
| J13 | Pneumonia due to <i>Streptococcus pneumoniae</i>                      |
| J14 | Pneumonia due to <i>Haemophilus influenzae</i>                        |
| J15 | Bacterial pneumonia, not elsewhere classified                         |
| J16 | Pneumonia due to other infectious organisms, not elsewhere classified |
| J17 | Pneumonia in diseases classified elsewhere                            |
| J18 | Pneumonia, organism unspecified                                       |
| J96 | Respiratory failure, not elsewhere classified                         |
| K25 | Gastric ulcer                                                         |
| K26 | Duodenal ulcer                                                        |
| K27 | Peptic ulcer, site unspecified                                        |
| N17 | Acute renal failure                                                   |

**If the codes occur as the main diagnosis after the first admission**

| Exact code |                                   |
|------------|-----------------------------------|
| K590       | Constipation                      |
| N991       | Postprocedural urethral stricture |

**Code starts with**

|     |                                               |
|-----|-----------------------------------------------|
| J20 | Acute bronchitis                              |
| J21 | Acute bronchiolitis                           |
| J22 | Unspecified acute lower respiratory infection |
| K29 | Gastritis and duodenitis                      |

**A. Surgical intervention codes**

If the codes occur during the first admission at a date after the primary surgery date or as the main intervention code at a later date

---

**Exact code**


---

|       |                                                                   |
|-------|-------------------------------------------------------------------|
| NFQ09 | Exarticulation of hip                                             |
| NFQ19 | Amputation of femur                                               |
| NFQ99 | Other amputation or related operation on hip or femur             |
| NGB59 | Patellofemoral prosthesis, supplementary                          |
| NGF01 | Total synovectomy of knee, arthroscopic                           |
| NGF02 | Total synovectomy of knee, open                                   |
| NGF10 | Partial synovectomy of knee, percutaneous                         |
| NGF11 | Partial synovectomy of knee, arthroscopic                         |
| NGF12 | Partial synovectomy of knee, open                                 |
| NGF91 | Other operation on synovia or joint surface of knee, arthroscopic |
| NGF92 | Other operation on synovia or joint surface of knee, open         |
| NGK09 | Excision of fragment of bone of knee or lower leg                 |
| NGK19 | Partial or total excision of bone of knee or lower leg            |
| NGM09 | Fasciotomy of knee or lower leg                                   |
| NGQ09 | Exarticulation of knee                                            |
| NGT09 | Removal of foreign body from tissue of knee or lower leg          |
| NGT19 | Forcible manipulation of knee joint                               |
| QDA10 | Incision of skin of lower limb. Includes: Drainage                |
| QDB00 | Suture of skin of lower limb                                      |
| QDB05 | Revision of wound of skin of lower limb                           |
| QDB99 | Other procedure for wound of skin of lower limb                   |
| QDE35 | Repair of skin defect of lower limb after surgery or injury       |
| TNG05 | Incision of soft tissue, knee and lower leg                       |
| TNG10 | Arthrocentesis, knee joint                                        |

---

**Code starts with**


---

|     |                                                                             |
|-----|-----------------------------------------------------------------------------|
| NGA | Exploratory procedures on knee and lower leg                                |
| NGC | Secondary prosthetic replacement of knee joint                              |
| NGE | Operations on capsules and ligaments of knee joint                          |
| NGG | Excision, reconstruction and fusion of knee joint                           |
| NGH | Miscellaneous operations on knee joint. Includes: Reduction of dislocations |
| NGJ | Fracture surgery of knee and lower leg                                      |
| NGL | Operations on muscles and tendons of knee and lower leg                     |
| NGS | Operations for infection of tendons, joints and bone of knee and lower leg  |
| NGU | Removal of implants and external fixation devices from knee and lower leg   |
| NGW | Reoperations on knee and lower leg                                          |
| QDG | Operations for chronic ulcers and fistulae of skin of lower limb            |

---

## Appendix 2: ICD 10- and NOMESCO codes used for definition of adverse events according to the Swedish Hip Arthroplasty Register (SHAR)

### DA. Surgical diagnosis

If the codes occur as the main or a secondary diagnosis during the first admission or as the main diagnosis during a later admission

| Exact code |                                                                                                                         |
|------------|-------------------------------------------------------------------------------------------------------------------------|
| G978       | Other postprocedural disorders of nervous system                                                                        |
| G979       | Postprocedural disorder of nervous system, unspecified                                                                  |
| M966F      | Fracture of bone following insertion of orthopaedic implant, joint prosthesis, or bone plate hip/femur                  |
| M968       | Other postprocedural musculoskeletal disorders                                                                          |
| M969       | Postprocedural musculoskeletal disorder, unspecified                                                                    |
| T810       | Haemorrhage and haematoma complicating a procedure, not elsewhere classified                                            |
| T812       | Accidental puncture and laceration during a procedure, not elsewhere classified                                         |
| T813       | Disruption of operation wound, not elsewhere classified                                                                 |
| T814       | Infection following a procedure, not elsewhere classified                                                               |
| T815       | Foreign body accidentally left in body cavity or operation wound following a procedure                                  |
| T816       | Acute reaction to foreign substance accidentally left during a procedure                                                |
| T817       | Vascular complications following a procedure, not elsewhere classified                                                  |
| T818       | Other complications of procedures, not elsewhere classified                                                             |
| T818W      | Other complications of procedures, not elsewhere classified                                                             |
| T819       | Unspecified complication of procedure                                                                                   |
| T840       | Mechanical complication of internal joint prosthesis                                                                    |
| T840F      | Mechanical complication of internal joint prosthesis hip/femur                                                          |
| T843       | Mechanical complication of other bone devices, implants and grafts                                                      |
| T843F      | Mechanical complication of other bone devices, implants and grafts hip/femur                                            |
| T844       | Mechanical complication of other internal orthopaedic devices, implants and grafts                                      |
| T844F      | Mechanical complication of other internal orthopaedic devices, implants and grafts, hip/femur                           |
| T845       | Infection and inflammatory reaction due to internal joint prosthesis                                                    |
| T845F      | Infection and inflammatory reaction due to internal joint prosthesis hip/femur                                          |
| T847       | Infection and inflammatory reaction due to other internal orthopaedic prosthetic devices, implants and grafts           |
| T847F      | Infection and inflammatory reaction due to other internal orthopaedic prosthetic devices, implants and grafts hip/femur |
| T848       | Other complications of internal orthopaedic prosthetic devices, implants and grafts                                     |
| T848F      | Other complications of internal orthopaedic prosthetic devices, implants and grafts hip/femur                           |
| T849       | Unspecified complication of internal orthopaedic prosthetic device, implant and graft                                   |
| T888       | Other specified complications of surgical and medical care, not elsewhere classified                                    |
| T889       | Complication of surgical and medical care, unspecified                                                                  |

### DB. Diagnosis for hip-related events

If the codes occur as the main or a secondary diagnosis during the first admission or as a main diagnosis during a later admission

| Exact code |                                                                               |
|------------|-------------------------------------------------------------------------------|
| G570       | Lesion of sciatic nerve                                                       |
| G571       | Meralgia paraesthetica                                                        |
| G572       | Lesion of femoral nerve                                                       |
| M000       | Staphylococcal arthritis and polyarthritis                                    |
| M000F      | Staphylococcal arthritis and polyarthritis hip/femur                          |
| M002F      | Other streptococcal arthritis and polyarthritis hip/femur                     |
| M008F      | Arthritis and polyarthritis due to other specified bacterial agents hip/femur |
| M009F      | Pyogenic arthritis, unspecified hip/femur                                     |
| M243       | Pathological dislocation and subluxation of joint, not elsewhere classified   |
| M244       | Recurrent dislocation and subluxation of joint                                |
| M244F      | Recurrent dislocation and subluxation of joint hip/femur                      |
| S730       | Dislocation of hip                                                            |

#### Code starts with

|     |                                         |
|-----|-----------------------------------------|
| S74 | Injury of nerves at hip and thigh level |
| S75 | Injury of femoral artery                |
| S76 | Injury of muscle and tendon of hip      |

#### If the codes occur as the main diagnosis after the first admission

| Exact code |                                                   |
|------------|---------------------------------------------------|
| M240F      | Loose body in joint hip/femur                     |
| M245F      | Contracture of joint hip/femur                    |
| M246F      | Ankylosis of joint hip/femur                      |
| M610F      | Myositis ossificans traumatica                    |
| M614       | Other calcification of muscle                     |
| M614F      | Other calcification of muscle hip/femur           |
| M621F      | Other rupture of muscle (nontraumatic) hip/femur  |
| M662F      | Spontaneous rupture of extensor tendons hip/femur |
| M663F      | Spontaneous rupture of flexor tendons hip/femur   |
| M843F      | Stress fracture, hip/femur                        |
| M860F      | Acute haematogenous osteomyelitis hip/femur       |
| M861F      | Other acute osteomyelitis hip/femur               |
| M866       | Other chronic osteomyelitis hip/femur             |
| M866F      | Other chronic osteomyelitis hip/femur             |
| M895E      | Osteolysis pelvis                                 |

**DC. Cardiovascular diagnosis**

If the codes occur as the main or a secondary diagnosis during the first admission or as the main diagnosis during a later admission

| Exact code |                                                                                |
|------------|--------------------------------------------------------------------------------|
| I260       | Pulmonary embolism with mention of acute cor pulmonale                         |
| I269       | Pulmonary embolism without mention of acute cor pulmonale                      |
| I460       | Cardiac arrest with successful resuscitation                                   |
| I461       | Sudden cardiac death, so described                                             |
| I469       | Cardiac arrest, unspecified                                                    |
| I490       | Ventricular fibrillation and flutter                                           |
| I649       | Stroke, not specified as haemorrhage or infarction                             |
| I770       | Arteriovenous fistula, acquired                                                |
| I771       | Stricture of artery                                                            |
| I772       | Rupture of artery                                                              |
| I819       | Portal vein thrombosis                                                         |
| I978       | Other postprocedural disorders of circulatory system, not elsewhere classified |
| I979       | Postprocedural disorder of circulatory system, unspecified                     |
| J809       | Adult respiratory distress syndrome                                            |
| J819       | Pulmonary oedema                                                               |
| T811       | Shock during or resulting from a procedure, not elsewhere classified           |

**Code starts with**

|     |                                                                                      |
|-----|--------------------------------------------------------------------------------------|
| I21 | Acute myocardial infarction                                                          |
| I24 | Other acute ischaemic heart diseases                                                 |
| I60 | Subarachnoid haemorrhage                                                             |
| I61 | Intracerebral haemorrhage                                                            |
| I62 | Other nontraumatic intracranial haemorrhage                                          |
| I63 | Cerebral infarction                                                                  |
| I65 | Occlusion and stenosis of precerebral arteries, not resulting in cerebral infarction |
| I66 | Occlusion and stenosis of cerebral arteries, not resulting in cerebral infarction    |
| I72 | Other aneurysm and dissection                                                        |
| I74 | Arterial embolism and thrombosis                                                     |
| I82 | Other venous embolism and thrombosis                                                 |

**DM. Diagnoses for other medical events**

If the codes occur as the main or a secondary diagnosis during the first admission or as a secondary diagnosis during a later admission

| Exact code |                                                              |
|------------|--------------------------------------------------------------|
| J952       | Acute pulmonary insufficiency following nonthoracic surgery  |
| J953       | Chronic pulmonary insufficiency following surgery            |
| J955       | Postprocedural subglottic stenosis                           |
| J958       | Other postprocedural respiratory disorders                   |
| J959       | Postprocedural respiratory disorder, unspecified             |
| J981       | Pulmonary collapse                                           |
| N990       | Postprocedural renal failure                                 |
| N998       | Other postprocedural disorders of genitourinary system       |
| N999       | Postprocedural disorder of genitourinary system, unspecified |
| R339       | Retention of urine                                           |

**Code starts with**

|     |                                                                       |
|-----|-----------------------------------------------------------------------|
| L89 | Decubitus ulcer and pressure area                                     |
| I80 | Phlebitis and thrombophlebitis                                        |
| J13 | Pneumonia due to <i>Streptococcus pneumoniae</i>                      |
| J14 | Pneumonia due to <i>Haemophilus influenzae</i>                        |
| J15 | Bacterial pneumonia, not elsewhere classified                         |
| J16 | Pneumonia due to other infectious organisms, not elsewhere classified |
| J17 | Pneumonia in diseases classified elsewhere                            |
| J18 | Pneumonia, organism unspecified                                       |
| J96 | Respiratory failure, not elsewhere classified                         |
| K25 | Gastric ulcer                                                         |
| K26 | Duodenal ulcer                                                        |
| K27 | Peptic ulcer, site unspecified                                        |
| N17 | Acute renal failure                                                   |

**If the codes occur as the main diagnosis after the first admission**

| Exact code |                                   |
|------------|-----------------------------------|
| K590       | Constipation                      |
| N991       | Postprocedural urethral stricture |

**Code starts with**

|     |                                               |
|-----|-----------------------------------------------|
| J20 | Acute bronchitis                              |
| J21 | Acute bronchiolitis                           |
| J22 | Unspecified acute lower respiratory infection |
| K29 | Gastritis and duodenitis                      |

**B. Surgical intervention codes**

If the codes occur during the first admission at a date after the primary surgery date or as the main intervention code at a later date

---

 Exact code
 

---

|       |                                                               |
|-------|---------------------------------------------------------------|
| NFQ09 | Exarticulation of the hip joint                               |
| NFA02 | Exploration of soft tissue of hip and thigh, open surgery     |
| NFA11 | Diagnostic arthroscopy of hip joint                           |
| NFA12 | Exploration of hip joint, open surgery                        |
| NFA20 | Biopsy of soft tissue or joint of hip and thigh, percutaneous |
| NFA21 | Biopsy of soft tissue or joint of hip and thigh, arthroscopic |
| NFA22 | Biopsy of soft tissue or joint of hip and thigh, open         |
| QDA10 | Incision of skin of lower limb. Includes: Drainage            |
| QDE35 | Repair of skin defect of lower limb after surgery or injury   |
| TNF05 | Incision of soft tissue hip and thigh                         |
| TNF10 | Arthrocentesis of hip joint                                   |
| QDB00 | Suture of skin of lower limb                                  |
| QDB05 | Revision of wound of skin of lower limb                       |
| QDB99 | Other procedure for wound of skin of lower limb               |

---

 Code starts with
 

---

|     |                                                                            |
|-----|----------------------------------------------------------------------------|
| NFC | Secondary prosthetic replacement of hip joint                              |
| NFF | Operations on synovia and surfaces of hip joint                            |
| NFG | Excision, reconstruction and fusion of hip joint                           |
| NFH | Miscellaneous operations on hip joint. Includes: Reduction of dislocations |
| NFJ | Fracture surgery of femur                                                  |
| NFK | Operations on femur                                                        |
| NFL | Operations on muscles and tendons of hip and thigh                         |
| NFM | Operations on muscles and tendons of hip and thigh                         |
| NFS | Operations for infection of tendons, joints and bone of hip and thigh      |
| NFT | Miscellaneous operations on hip or thigh                                   |
| NFU | Removal of implants and external fixation devices from hip and femur       |
| NFW | Reoperations on hip or thigh                                               |
| QDG | Operations for chronic ulcers and fistulae of skin of lower limb           |

---
